# Supplementary material for: Enhanced Delivery of Insulin through Acrylamide-Modified Chitosan Containing Smart Carrier System
Source: MDPI journal article supplement (doi:10.3390/gels8110701), 2022-10-30
Supplement: s1 [file s1]

## Supporting Information

### Enhanced Delivery of Insulin through Acrylamide-Modified Chitosan Containing Smart Carrier System

Wasmia Mohammed Dahan, Faruq Mohammad, AbdelRahman O. Ezzat, Ayman M. Atta, Hissah Hamad Al-Tilasi and Hamad A. Al-Lohedan \*

Surfactants Research Chair, Department of Chemistry, College of Science, King Saud University, PO Box 2455, Riyadh 11451 Kingdom of Saudi Arabia

\* Correspondence: hlohedan@ksu.edu.sa; Tel: +955-114675991

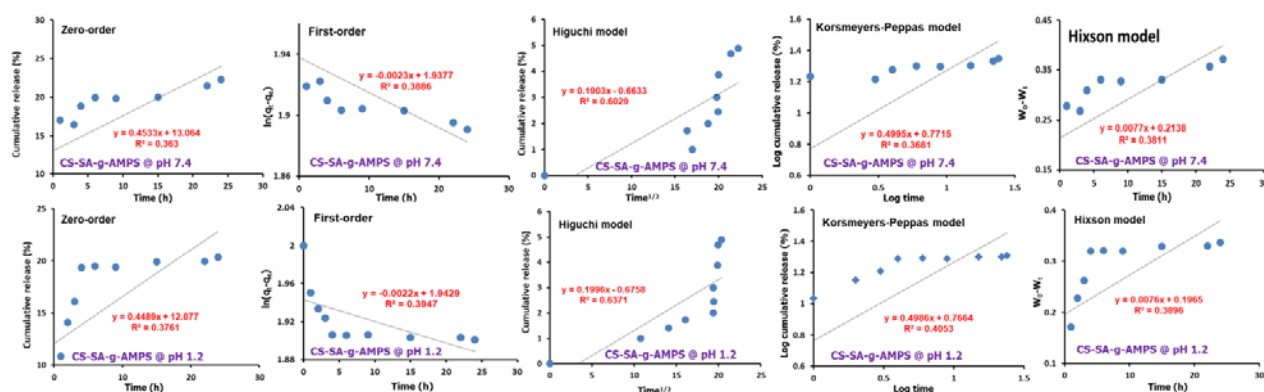

Figure S1: Kinetic studies of CS-SA-g-AMPS.

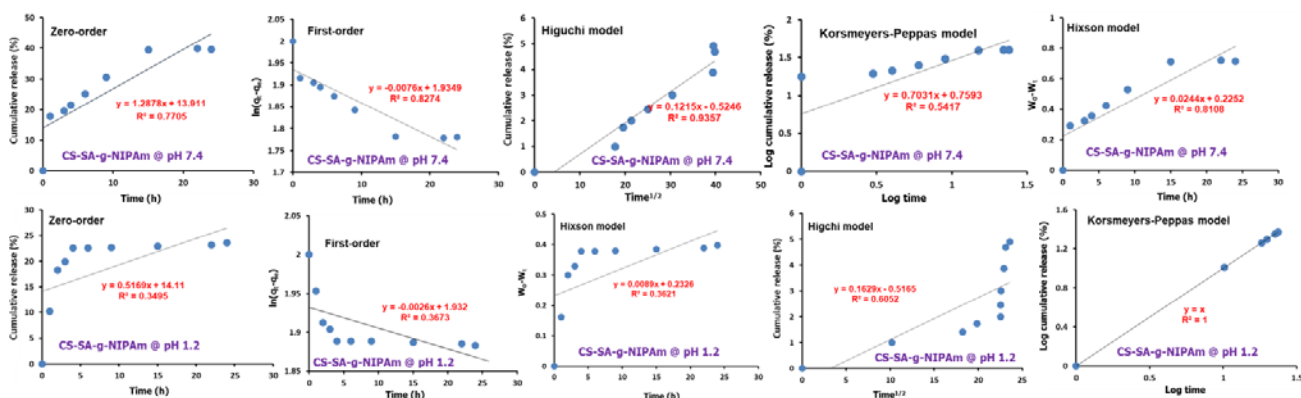

Figure S2: Kinetic studies of CS-SA-g-NIPAm.

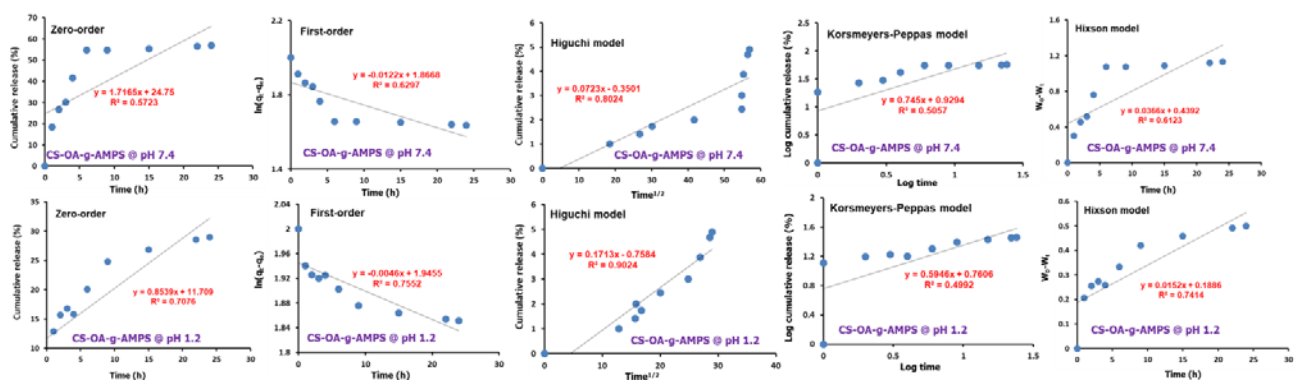

Figure S3: Kinetic studies of CS-OA-g-AMPS

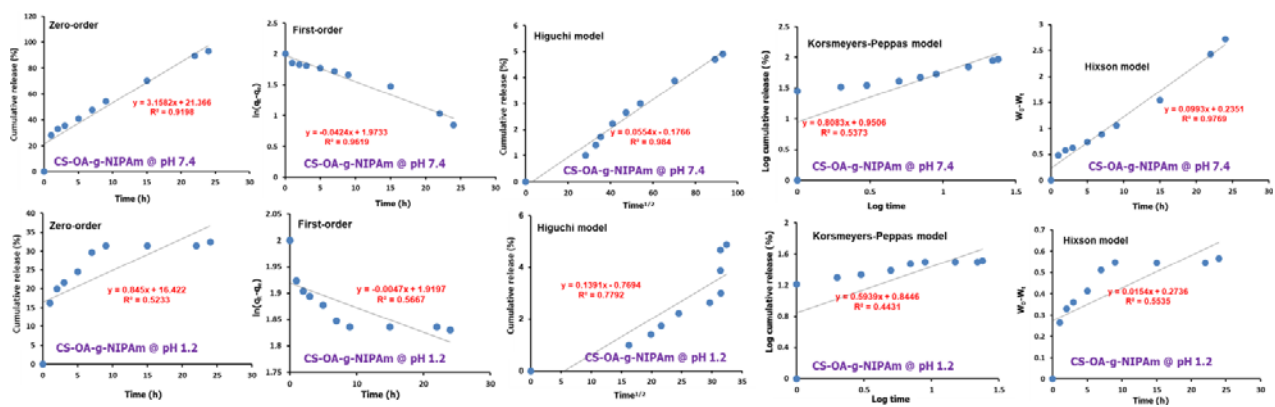

Figure S4: Kinetic studies of CS-OA-g-NIPAm.

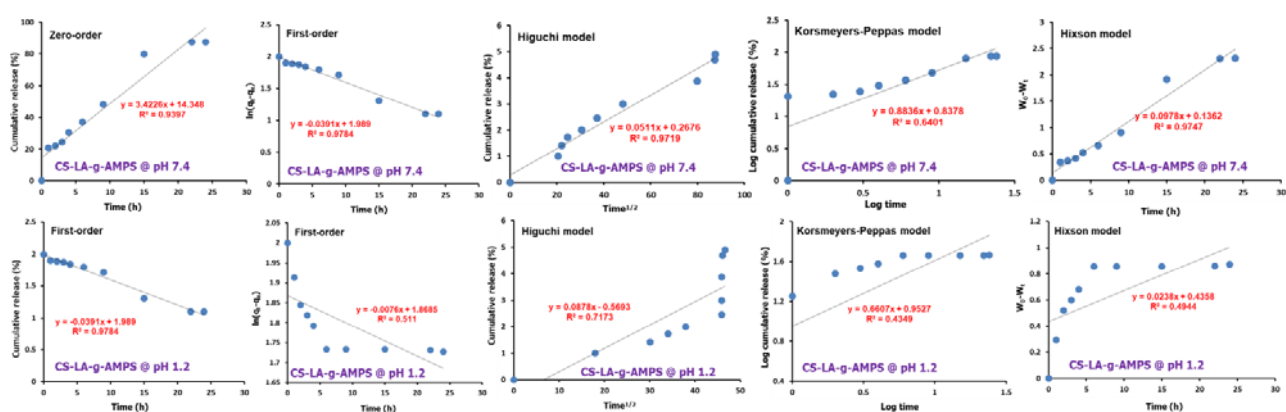

Figure S5: Kinetic studies of CS-LA-g-AMPS

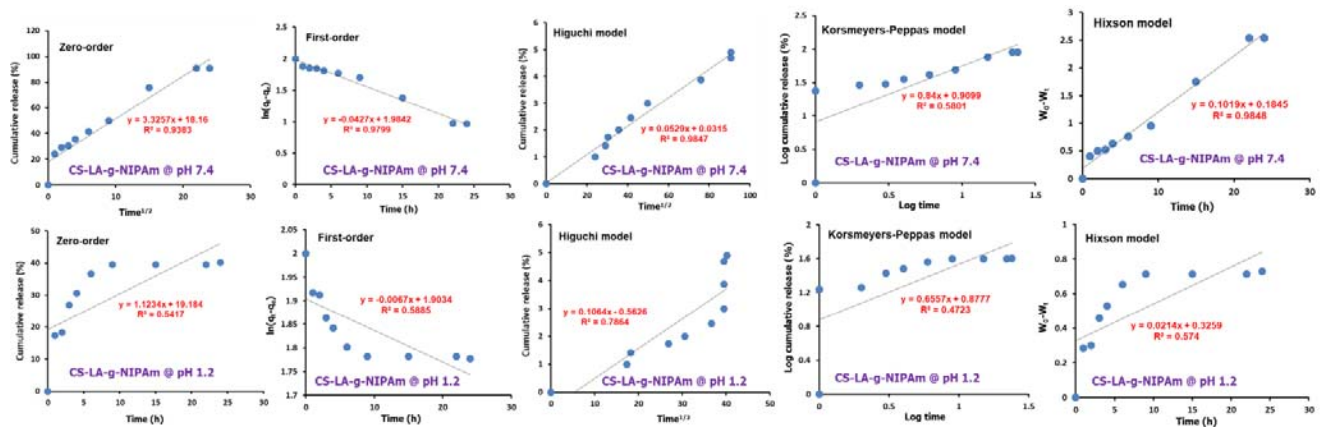

Figure S6: Kinetic studies of CS-LA-g-NIPAm.
